# Supplementary material
Source: PubMed Central journal article supplement (PMC2646152)

a.

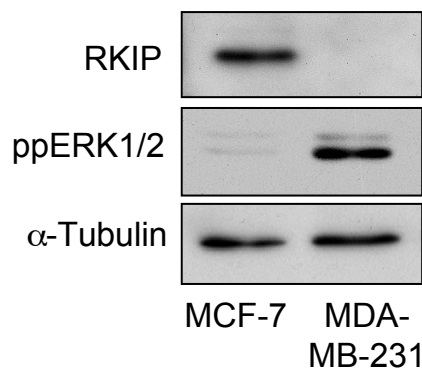

b.

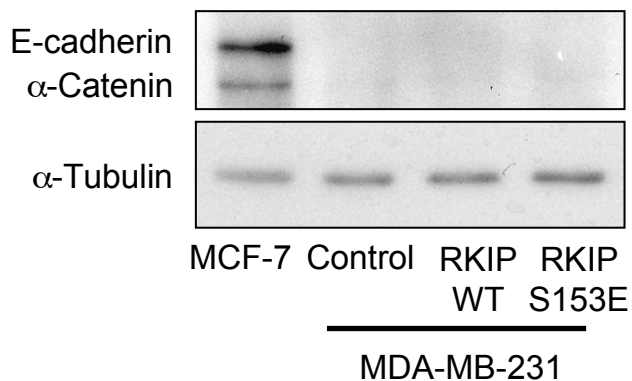

c.

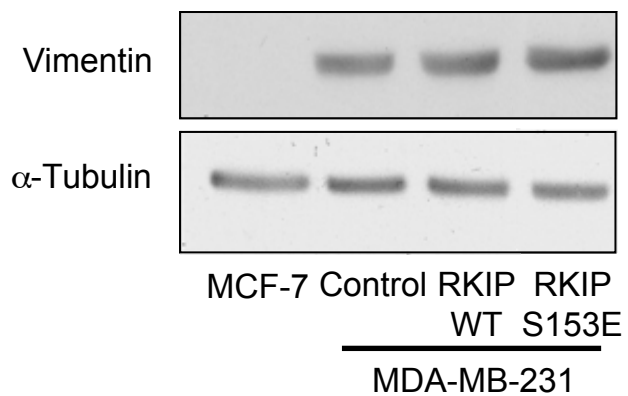

d.

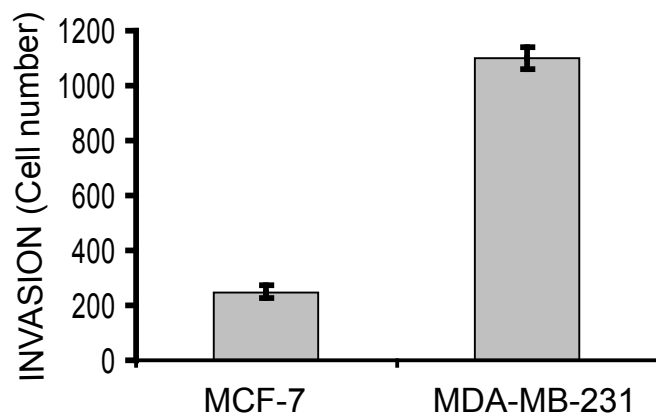

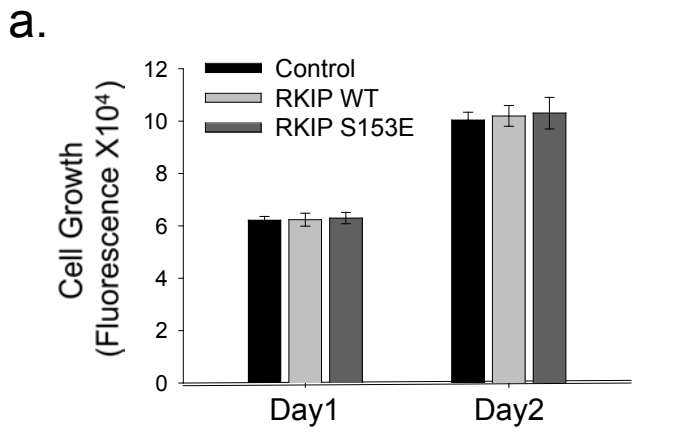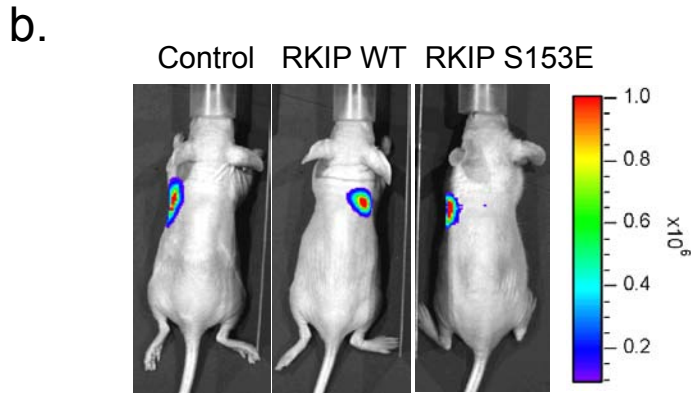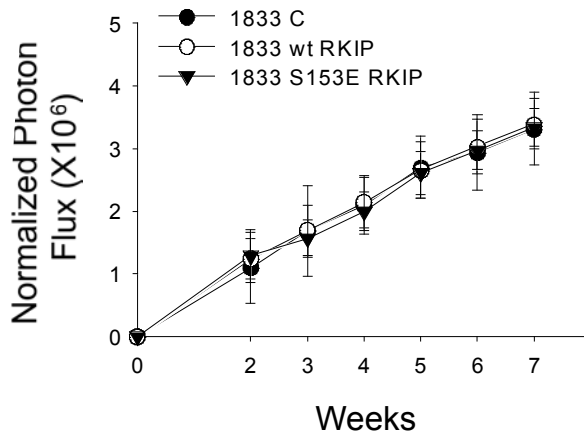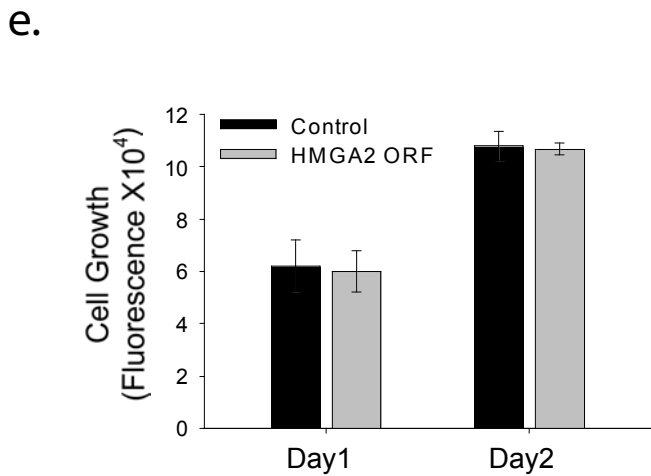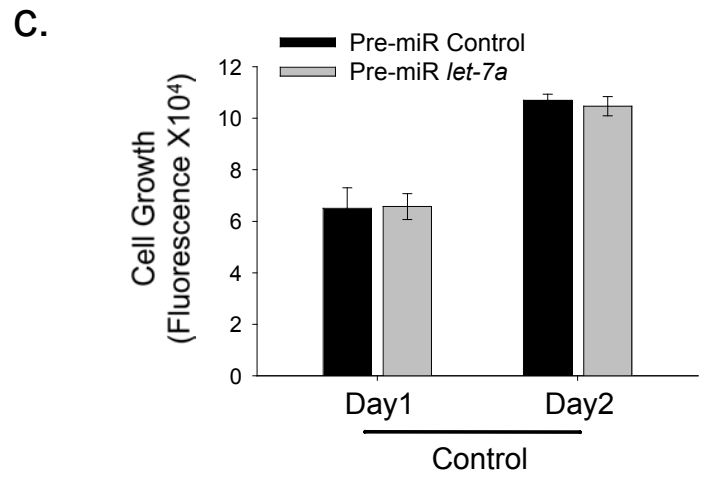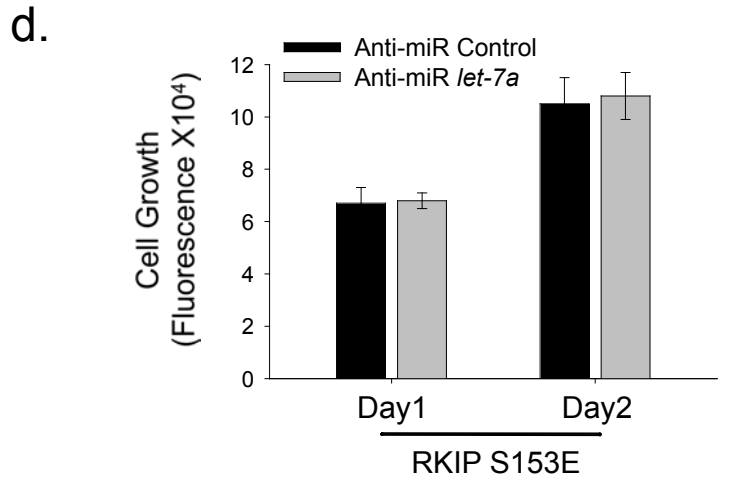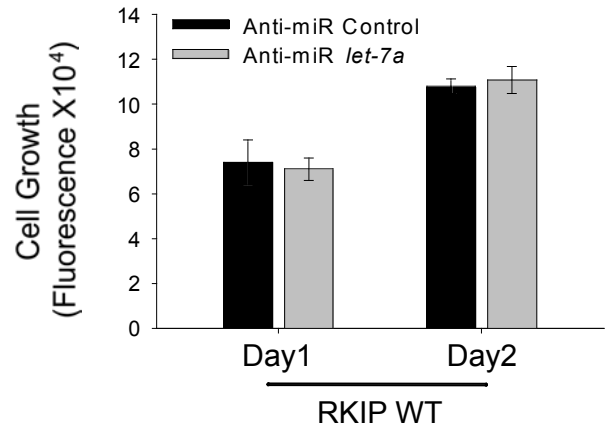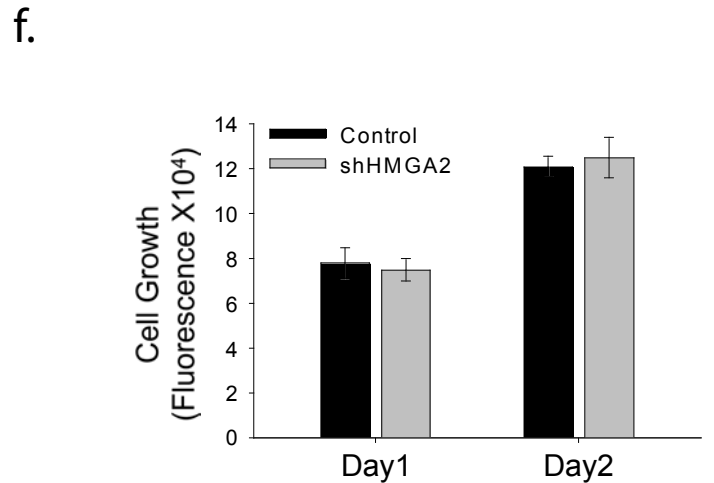

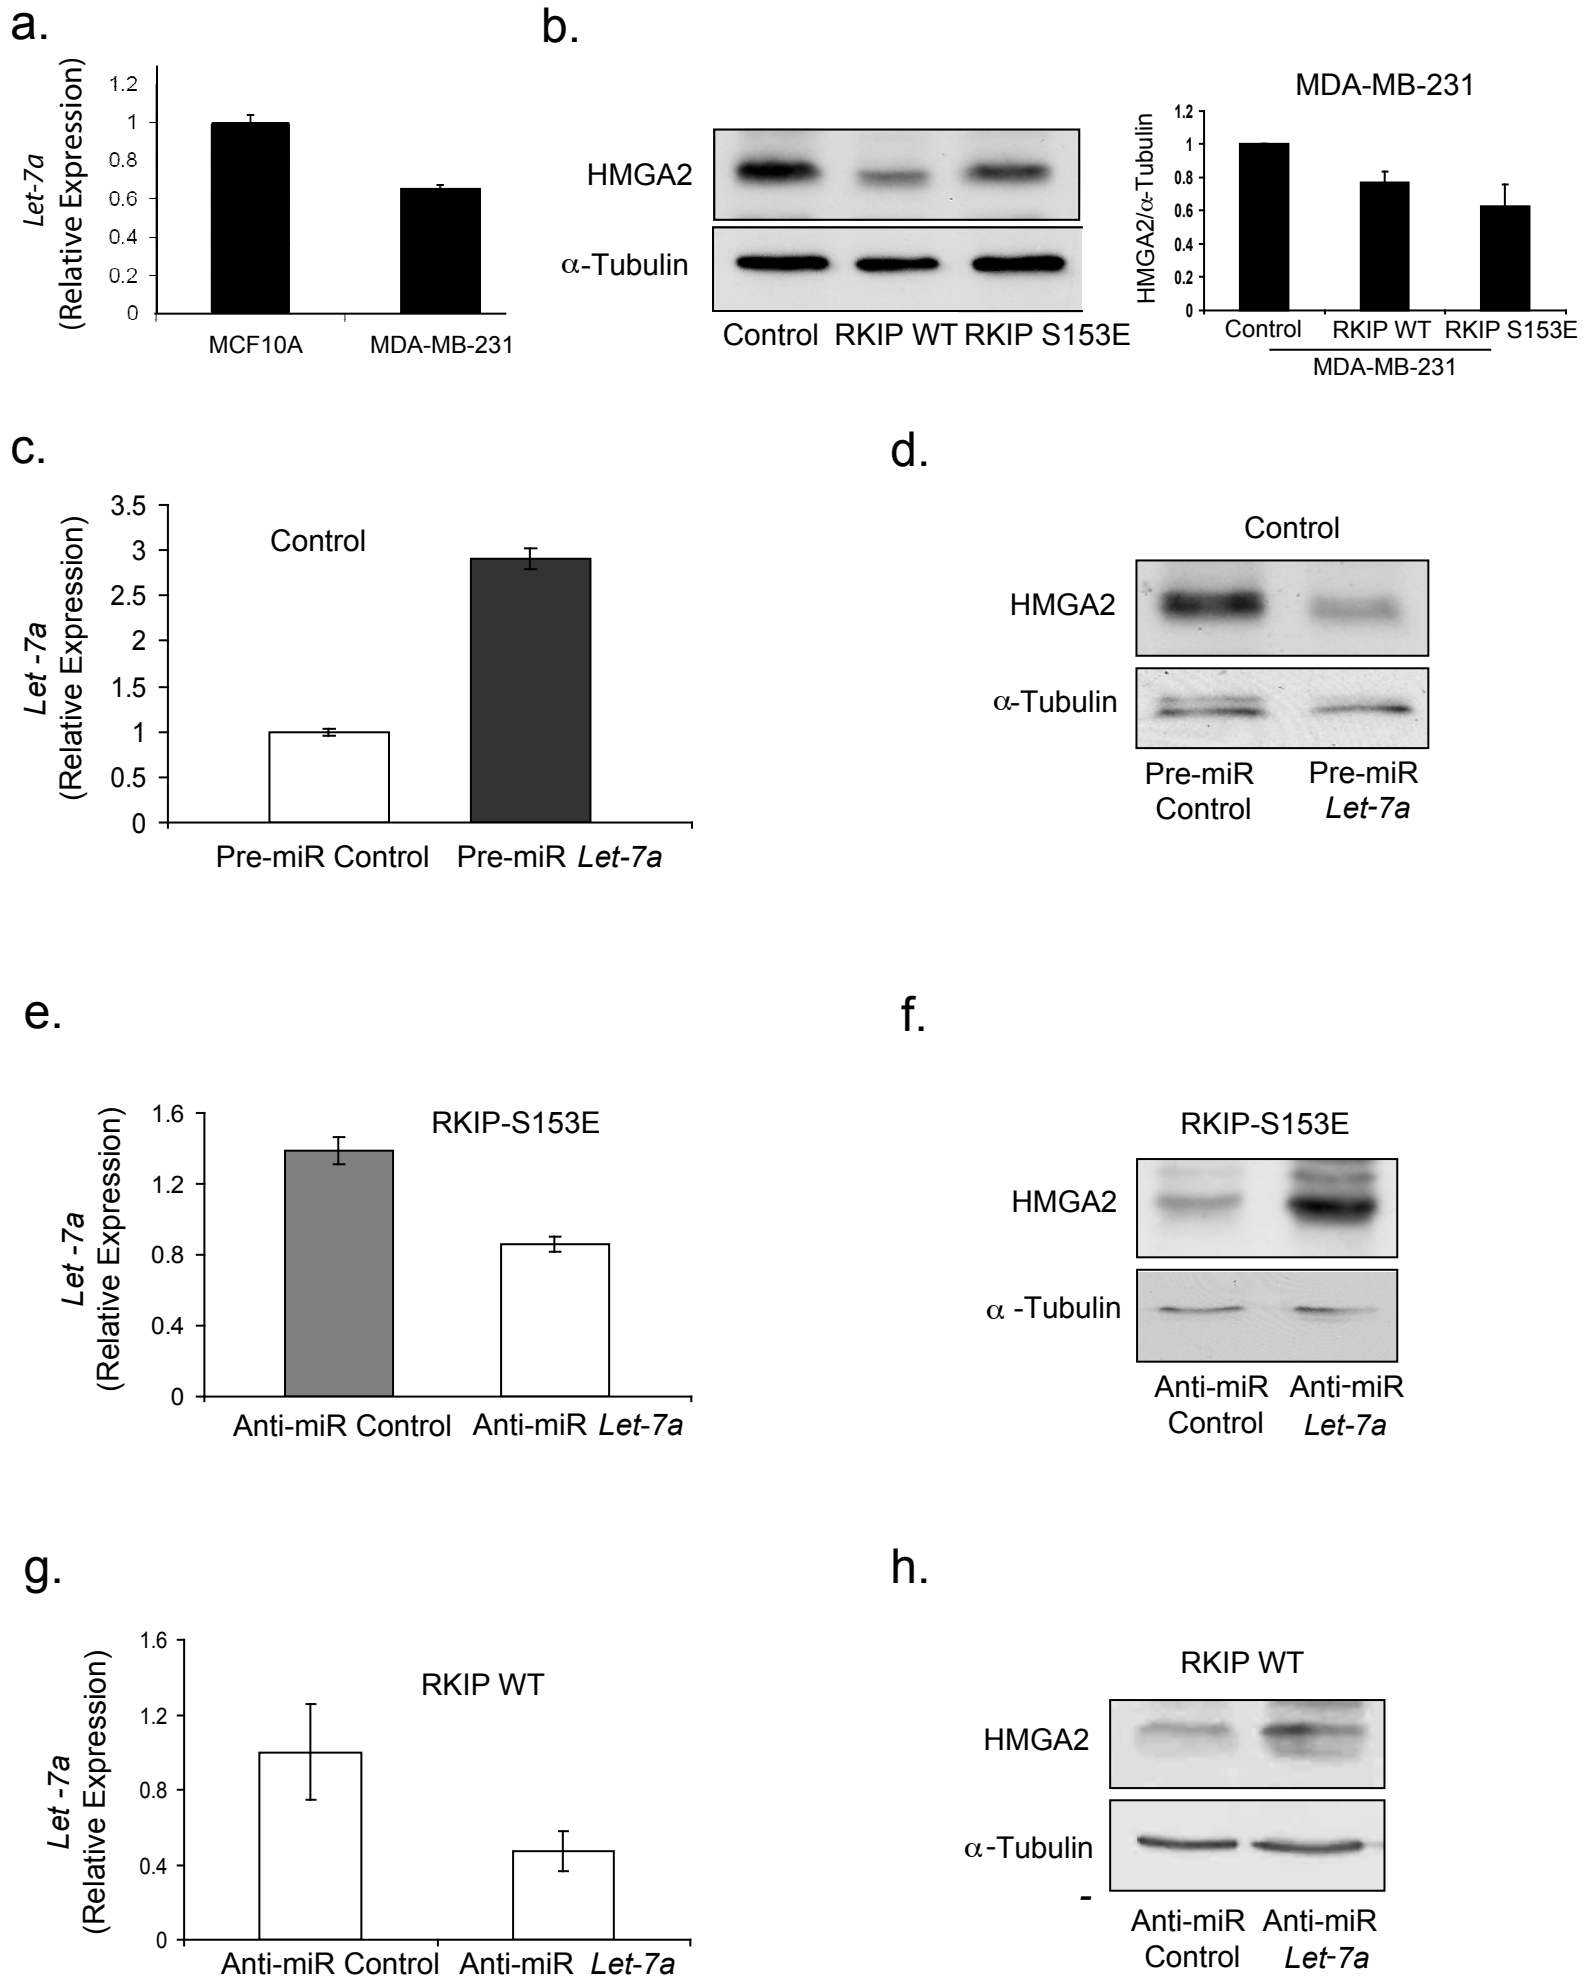

a.

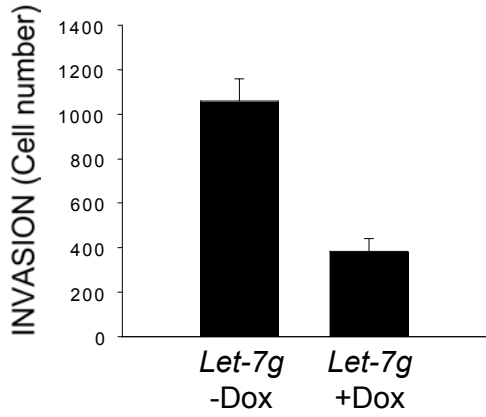

b.

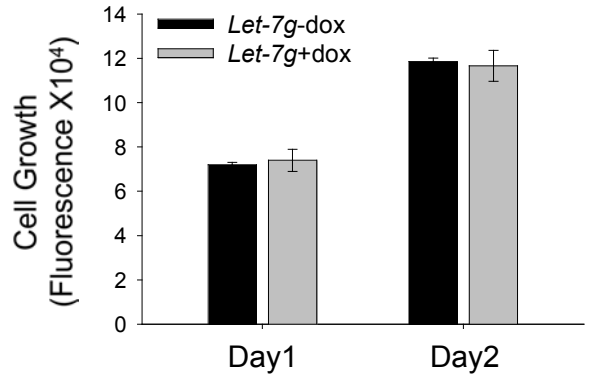

c.

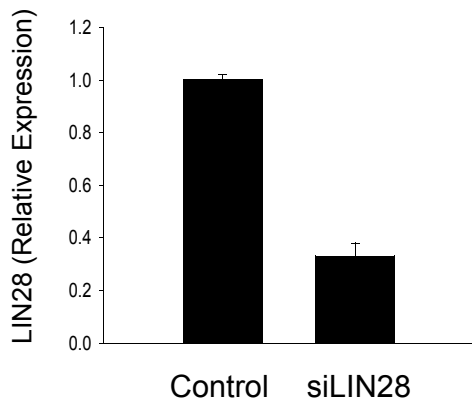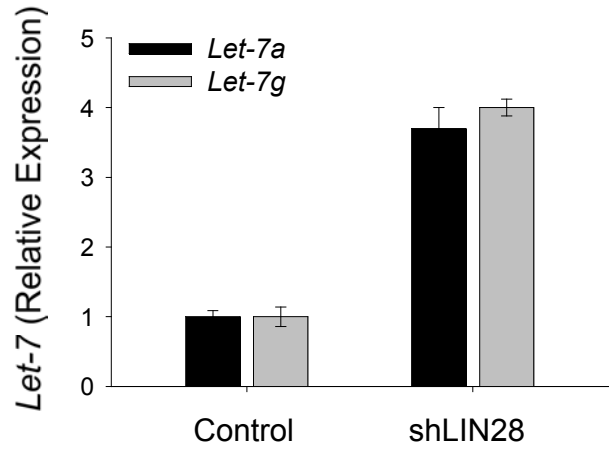

d.

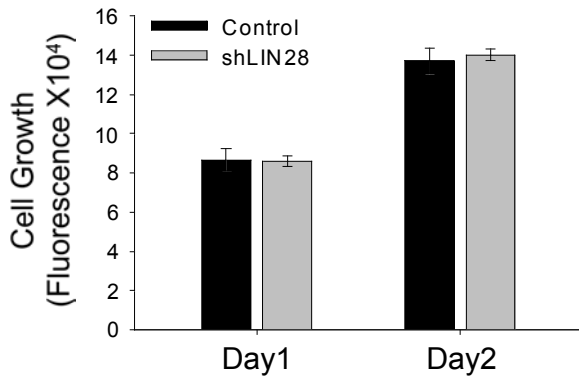

e.

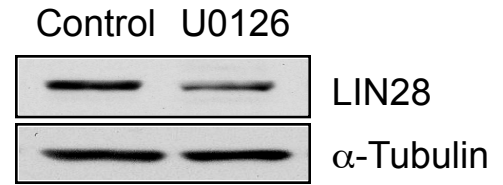

f.

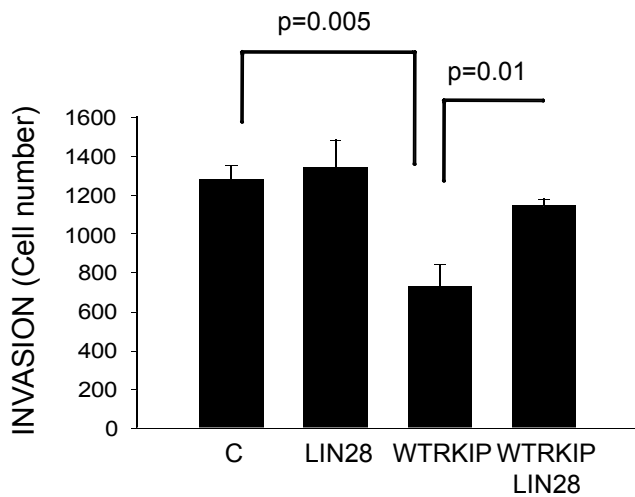

g.

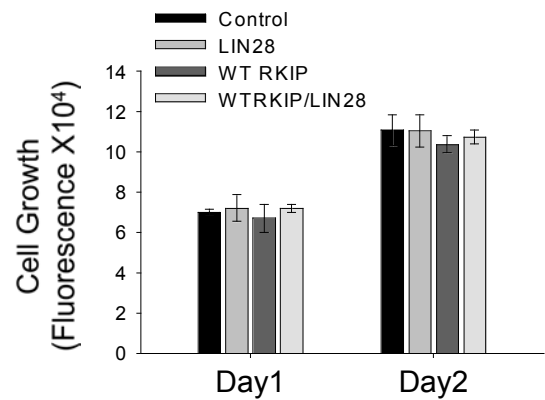

a.

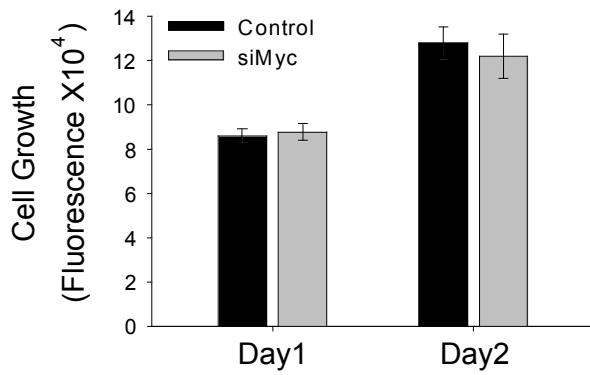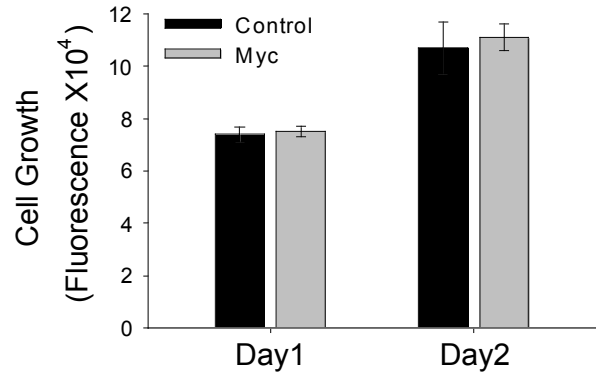

b.

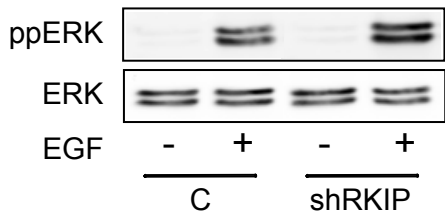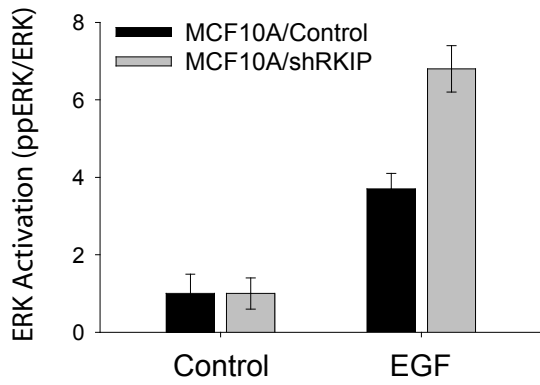

c.

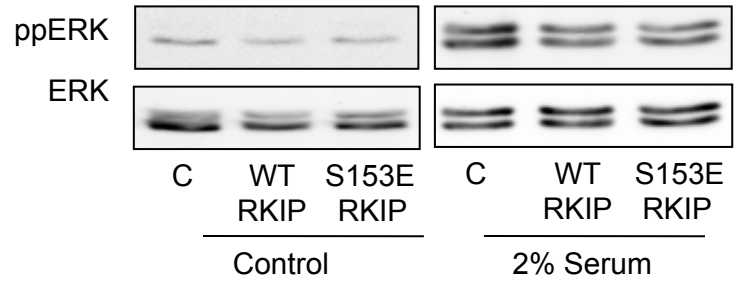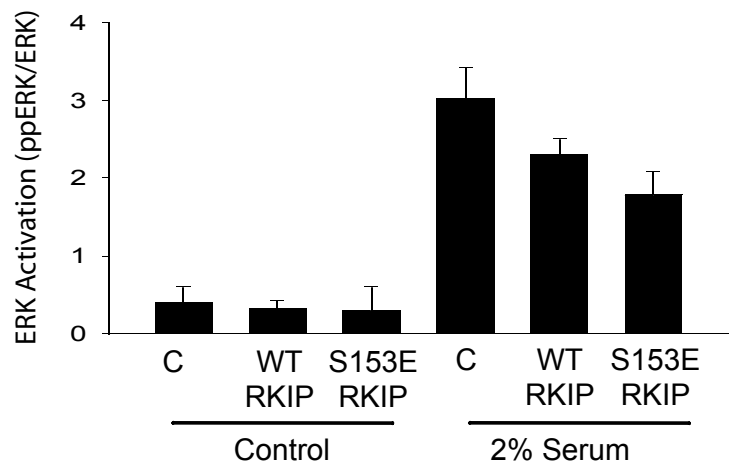

a.

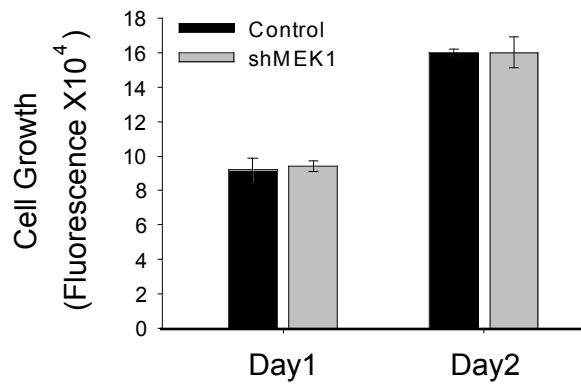

b.

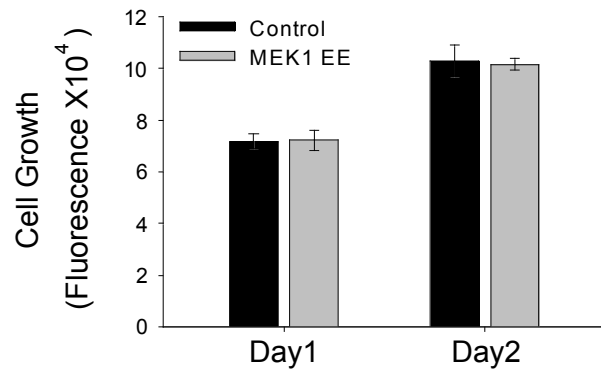

c.

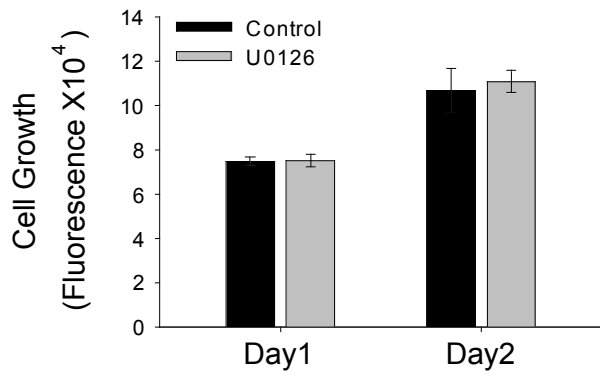

d.

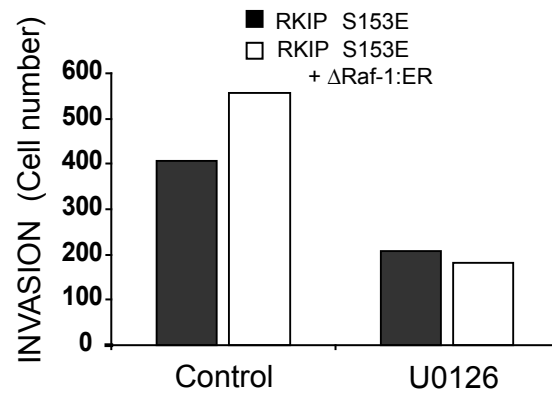

Supplement: emboj2008294s1.pdf [file emboj2008294s1.pdf]
